# Supplementary material for: SARS-CoV-2 Spike Protein Activates Human Lung Macrophages
Source: MDPI journal article supplement (doi:10.3390/ijms24033036), 2023-02-03
Supplement: s1 [file s1]

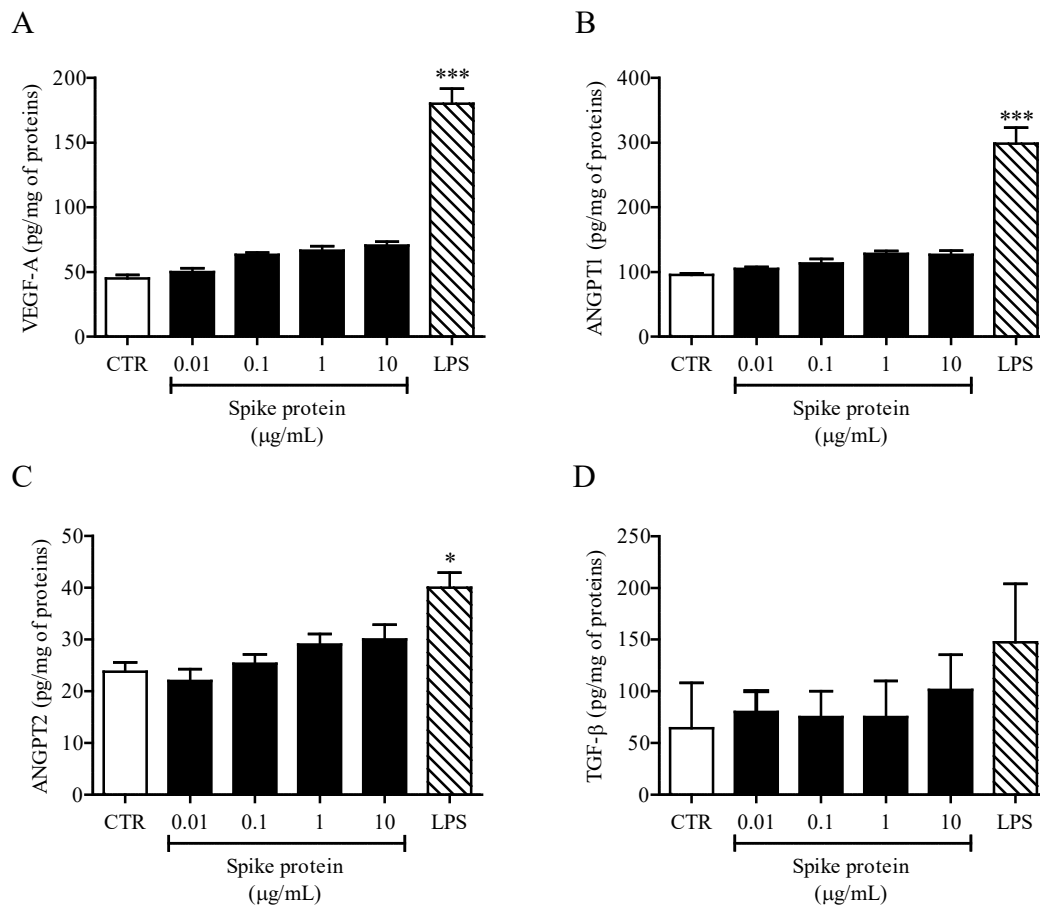

**Figure S1. Effects of Spike protein on the release of vasoactive factors and TGF-β from human lung macrophages (HLMs).** HLMs ( $1 \times 10^6$  cells/well) were incubated (18 hrs, 37°C) with complete media (CTR) or increasing concentrations of Spike protein (0.01-10 µg/mL) or LPS (1 µg/mL). VEGF-A (A), ANGPT1 (B), ANGPT2 (C) and TGF-β (D) proteins in supernatants were evaluated by ELISA. Data are the mean  $\pm$  SD of 8 experiments obtained from different donors. \* $p < 0.05$ ; \*\*\* $p < 0.001$  vs CTR.

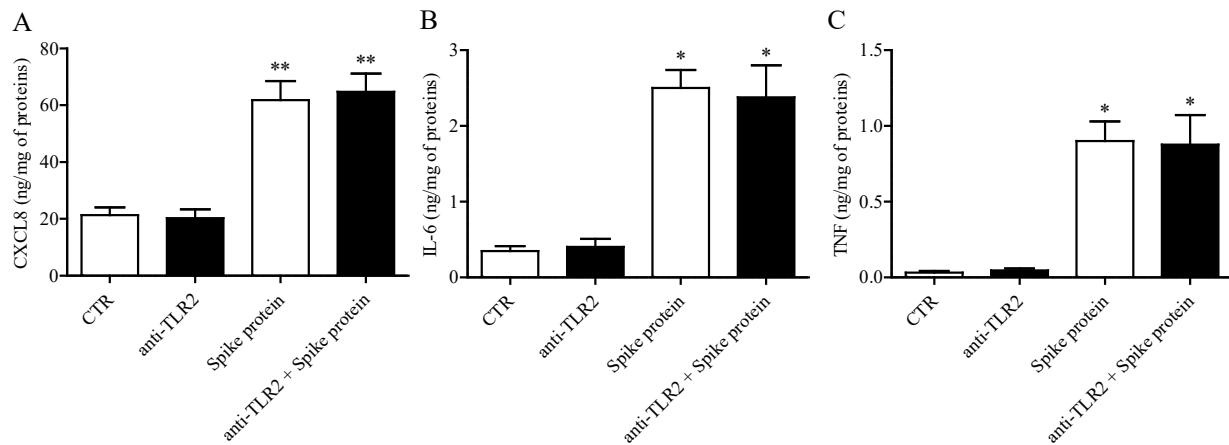

**Figure S2. Effects of anti-TLR2 on cytokine and chemokine release from human lung macrophages (HLMs) induced by Spike protein.** HLMs ( $1 \times 10^6$  cells/well) were preincubated (10 min, 37°C) with or without polyclonal antibody anti-TLR2 (5 µg/ml) and then stimulated (18 hrs, 37°C) with complete medium (CTR) or Spike protein (1 µg/mL). CXCL8 (A), IL-6 (B) and TNF-α (C) proteins in supernatants were evaluated by ELISA. Data are the mean  $\pm$  SD of 4 experiments obtained from different donors. \* $p < 0.05$ ; \*\* $p < 0.01$  vs CTR and anti-TLR-2 alone.

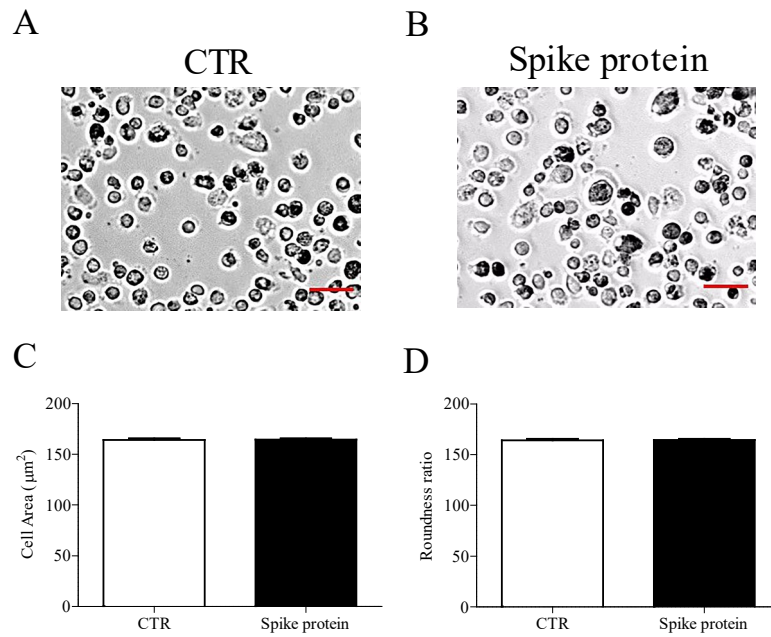

**Figure S3. Effect of Spike protein on morphological changes in human lung macrophages (HLMS).** HLMS ( $150 \times 10^3$  cells/well) were incubated (6 hrs, 37 °C) with RPMI alone (CTR) or Spike protein (1 µg/mL) and then were imaged by means of an Operetta high-content imaging system at 10× magnification. The images (**A** and **B**) were analyzed in the Harmony software with PhenoLOGIC (PerkinElmer) and a dedicated analysis sequence (morphological properties, method STAR) to evaluate cell area (**C**) and roundness (**D**). Scale Bar 50 µm (red line). Data are the mean  $\pm$  SD of 5 experiments obtained from different donors.
